# Supplementary material for: Microbial inhibitors of the fungus Pseudogymnoascus destructans, the causal agent of white-nose syndrome in bats
Source: PLoS One. 2017 Jun 20;12(6):e0179770. doi: 10.1371/journal.pone.0179770 (PMC5478148; doi:10.1371/journal.pone.0179770)
Supplement: S3 Table — Antagonists were inoculated on 3-ml PDA slants inside of headspace jars and volatiles were identified. Also listed is the corresponding retention time, molecular formula, match factor (MF), reverse match factor (RMF), probability of match (Prob), and in library (InLib) score for each proposed identification. Italicized entries were tested against P. destructans in further assays. (XLSX) [file pone.0179770.s004.xlsx]

## Sheet: Sheet1
Antagonist	Retention time (min)	Most probable identification	Molecular Formula	MF, RMF	Prob	InLib Score
Cystofilobasidium capitatum RW3I1a	5.76	Ethanol, 2-(1-methylethoxy)-	C5H12O2	808, 808	0.635	-240
	6.23	1-Propanol, 2-methyl-	C4H10O	890, 940	0.865	191
	7.93	1-Butanol, 2-methyl-	C5H12O	933, 933	0.692	113
	20.83	12-Crown-4	C8H16O4	588, 620	0.252	-1424
	22.35	Ethaneperoxoic acid, 1-cyano-1-[2-(2-phenyl-1,3-dioxolan-2-yl)ethyl]pentyl ester	C19H25NO5	771, 884	0.211	-539
Pantoea sp. OA1I3M	5.76	Hexane, 3-methoxy	C7H16O	656, 782	0.321	-1103
	6.22	1-Propanol, 2-methyl-	C4H10O	832, 878	0.735	-161
	7.93	1-Pentanol	C5H12O	891, 893	0.291	-138
	9.36	Urea, ethyl-	C3H8N2O	772, 841	0.619	-324
Pantoea ananatis RFA4P2	5.76	2-Propanone, 1-(1-methylethoxy)-	C6H12O2	685, 873	0.325	-941
	6.23	Propanoic acid	C3H6O2	891, 891	0.705	146
	7.94	1-Pentanol	C5H12O	939, 943	0.525	184
	9.36	Morpholine, 4-[[(dimethylamino)thioxomethyl]thio]-	C7H14N2OS2	811, 811	0.291	-371
Oidiodendron sp. PCA20P	n/a	n/a	n/a	n/a	n/a	n/a
PDA-only control	5.76	Acetone, ethyl methyl acetal	C6H14O2	704, 766	0.766	-190
